# Supplementary material
Source: Springer Nature journal article supplement (https://www.springermedizin.de/resource/supplementary/12876_2012_935_MOESM1_ESM.pdf/9438100)

**A**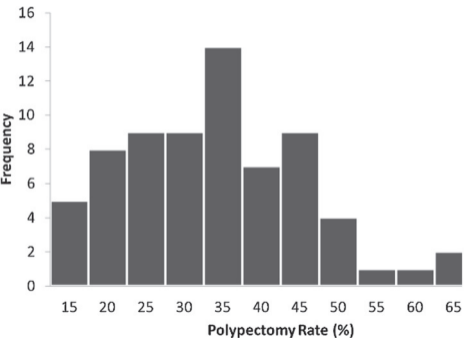**B**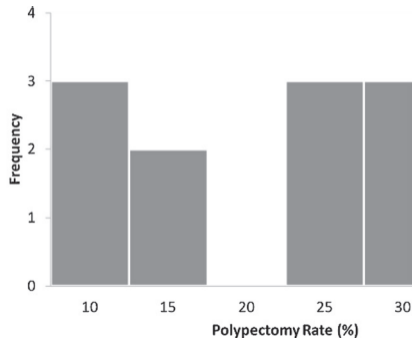

Supplement: MOESM1 [file 9438100]
